# Supplementary material for: Genetic structure across urban and agricultural landscapes reveals evidence of resource specialization and philopatry in the Eastern carpenter bee, Xylocopa virginica L
Source: PubMed Central journal article supplement (PMC7819568; doi:10.1111/eva.13078), 2020-08-28
Supplement: EVA-14-136-s001.pdf [file EVA-14-136-s001.pdf]

**Supporting Information for “Genetic structure across urban and agricultural landscapes reveals evidence of resource specialization and philopatry in the Eastern carpenter bee, *Xylocopa virginica* L.”**

**Kimberly M. Ballare<sup>1,2</sup> and Shalene Jha<sup>1</sup>**

<sup>1</sup> Department of Integrative Biology, The University of Texas at Austin, 205 W 24th Street, 401 Biological Laboratories, Austin, TX 78712, USA

<sup>2</sup> Present Address: Department of Ecology and Evolutionary Biology, University of California Santa Cruz, Santa Cruz, CA 95060, USA

**Table S1.** Collection locations, coordinates, and genetic characteristics for 579 female *Xylocopa virginica* genotyped at 10 microsatellite loci. Some populations’  $N_e$  was calculated as infinite, likely due to small samples sizes in those populations (Jones & Wang 2010).

| Site Name                      | Transect Number | Region (Nearest City) | Site Code | Latitude | Longitude | N   | $N_p$ | $H_o$ | $H_e$ | $F_{IS}$ | $N_e$    |
|--------------------------------|-----------------|-----------------------|-----------|----------|-----------|-----|-------|-------|-------|----------|----------|
| Barton Creek Habitat Preserve  | 1               | Austin                | BC1       | -97.915  | 30.306    | 18  | 0     | 0.555 | 0.632 | 0.123    | -        |
| Barton Creek Habitat Preserve  | 2               | Austin                | BC2       | -97.916  | 30.303    | 10  | 0     | 0.449 | 0.600 | 0.253    | -        |
| Barton Creek Habitat Preserve  | 3               | Austin                | BC3       | -97.912  | 30.300    | 0   | -     | -     | -     | -        | -        |
| Barton Creek Habitat Preserve  | 4               | Austin                | BC4       | -97.910  | 30.298    | 13  | 0     | 0.516 | 0.622 | 0.171    | -        |
| Barton Creek Habitat Preserve  | 5               | Austin                | BC5       | -97.909  | 30.296    | 11  | 0     | 0.478 | 0.631 | 0.243    | -        |
| Barton Creek Habitat Preserve  | All             | Austin                | BC        | -        | -         | 52  | 0     | 0.509 | 0.645 | 0.211    | 61       |
| Clymer Meadow Preserve         | 1               | Dallas                | CL1       | -96.242  | 33.302    | 1   | 0     | 0.600 | 0.300 | NA       | -        |
| Clymer Meadow Preserve         | 2               | Dallas                | CL2       | -96.243  | 33.305    | 16  | 1     | 0.628 | 0.669 | 0.061    | -        |
| Clymer Meadow Preserve         | 3               | Dallas                | CL3       | -96.243  | 33.308    | 5   | 0     | 0.502 | 0.565 | 0.112    | -        |
| Clymer Meadow Preserve         | 4               | Dallas                | CL4       | -96.243  | 33.311    | 7   | 0     | 0.586 | 0.598 | 0.020    | -        |
| Clymer Meadow Preserve         | 5               | Dallas                | CL5       | -96.243  | 33.314    | 8   | 0     | 0.553 | 0.655 | 0.157    | -        |
| Clymer Meadow Preserve         | All             | Dallas                | CL        | -        | -         | 37  | 0     | 0.587 | 0.691 | 0.151    | 44       |
| Clear Creek Natural Heritage   | NA              | Dallas                | CNH       | -97.065  | 33.261    | 7   | 1     | 0.614 | 0.651 | 0.056    | $\infty$ |
| Connemara Prairie              | NA              | Dallas                | CON       | -96.703  | 33.083    | 5   | 0     | 0.572 | 0.550 | -0.040   | $\infty$ |
| Harry S Moss Park              | NA              | Dallas                | HRM       | -96.748  | 32.893    | 9   | 1     | 0.594 | 0.642 | 0.075    | 144      |
| Lake Whitney State Park        | NA              | Waco                  | LKW       | -97.355  | 31.925    | 26  | 2     | 0.589 | 0.676 | 0.130    | 44       |
| Mathew's Prairie               | 1               | Dallas                | MA1       | -96.237  | 33.172    | 6   | 0     | 0.592 | 0.653 | 0.093    | -        |
| Mathew's Prairie               | 2               | Dallas                | MA2       | -96.238  | 33.170    | 10  | 0     | 0.620 | 0.622 | 0.003    | -        |
| Mathew's Prairie               | 3               | Dallas                | MA3       | -96.239  | 33.168    | 36  | 1     | 0.588 | 0.639 | 0.080    | -        |
| Mathew's Prairie               | 4               | Dallas                | MA4       | -96.241  | 33.167    | 26  | 2     | 0.623 | 0.653 | 0.046    | -        |
| Mathew's Prairie               | 5               | Dallas                | MA5       | -96.242  | 33.165    | 22  | 1     | 0.606 | 0.698 | 0.132    | -        |
| Mathew's Prairie               | All             | Dallas                | MA        | -        | -         | 100 | 4     | 0.604 | 0.687 | 0.121    | 92       |
| M & J Farms                    | NA              | Austin                | MJF       | -98.331  | 30.457    | 9   | 0     | 0.651 | 0.684 | 0.048    | 90       |
| Onion Creek Wildlife Sanctuary | NA              | Austin                | ONC       | -97.614  | 30.198    | 5   | 0     | 0.640 | 0.674 | 0.050    | $\infty$ |
| Pedernales Falls State Park    | NA              | Austin                | PED       | -98.259  | 30.332    | 17  | 1     | 0.518 | 0.642 | 0.193    | 78       |
| R & C Dairy                    | NA              | Dallas                | RCR       | -96.910  | 33.531    | 9   | 0     | 0.629 | 0.696 | 0.097    | 144      |
| Ray Roberts Lake State Park    | NA              | Dallas                | RRL       | -97.091  | 33.352    | 26  | 1     | 0.580 | 0.662 | 0.123    | 41       |
| Smiley Woodfen Prairie         | 1               | Dallas                | SM1       | -95.698  | 33.646    | 19  | 0     | 0.684 | 0.715 | 0.044    | -        |
| Smiley Woodfen Prairie         | 2               | Dallas                | SM2       | -95.698  | 33.648    | 29  | 0     | 0.638 | 0.677 | 0.058    | -        |
| Smiley Woodfen Prairie         | 3               | Dallas                | SM3       | -95.698  | 33.652    | 26  | 0     | 0.568 | 0.627 | 0.093    | -        |
| Smiley Woodfen Prairie         | 4               | Dallas                | SM4       | -95.698  | 33.654    | 40  | 5     | 0.612 | 0.653 | 0.063    | -        |
| Smiley Woodfen Prairie         | 5               | Dallas                | SM5       | -95.698  | 33.657    | 13  | 1     | 0.626 | 0.655 | 0.044    | -        |
| Smiley Woodfen Prairie         | All             | Dallas                | SM        | -        | -         | 127 | 6     | 0.609 | 0.701 | 0.137    | 108      |
| Water Quality Protection Lands | 1               | Austin                | WQ1       | -97.957  | 30.066    | 29  | 0     | 0.616 | 0.650 | 0.052    | -        |
| Water Quality Protection Lands | 2               | Austin                | WQ2       | -97.957  | 30.065    | 25  | 1     | 0.627 | 0.708 | 0.114    | -        |
| Water Quality Protection Lands | 3               | Austin                | WQ3       | -97.957  | 30.063    | 35  | 3     | 0.676 | 0.693 | 0.024    | -        |
| Water Quality Protection Lands | 4               | Austin                | WQ4       | -97.957  | 30.060    | 32  | 5     | 0.600 | 0.692 | 0.133    | -        |
| Water Quality Protection Lands | 5               | Austin                | WQ5       | -97.957  | 30.057    | 29  | 2     | 0.686 | 0.695 | 0.013    | -        |
| Water Quality Protection Lands | All             | Austin                | WQ        | -        | -         | 150 | 11    | 0.643 | 0.709 | 0.092    | 111      |

$N$ , number of individuals collected at the location;  $N_p$ , number of private alleles;  $H_o$ , observed heterozygosity;  $H_e$ , expected heterozygosity;  $F_{IS}$ , inbreeding coefficient;  $N_e$ , effective population size.

**Table S2.** Characteristics of ten microsatellite loci amplified in 579 *Xylocopa virginica* females. Size range indicates allele DNA fragment length.

| Locus        | Multiplex Group | Size Range | N <sub>A</sub> | H <sub>o</sub> | H <sub>e</sub> | F <sub>ST</sub> | G' <sub>ST</sub> |
|--------------|-----------------|------------|----------------|----------------|----------------|-----------------|------------------|
| XV03         | 1               | 204-258    | 14             | 0.693          | 0.871          | 0.012           | 0.089            |
| XV14         | 1               | 287-322    | 9              | 0.455          | 0.560          | 0.161           | 0.402            |
| XV24         | 1               | 176-217    | 13             | 0.436          | 0.554          | 0.017           | 0.035            |
| XV07         | 1               | 296-349    | 15             | 0.608          | 0.850          | 0.047           | 0.270            |
| XV09         | 1               | 170-210    | 11             | 0.634          | 0.727          | 0.036           | 0.114            |
| XV28         | 1               | 243-295    | 19             | 0.821          | 0.892          | 0.004           | 0.041            |
| XF27         | 2               | 136-151    | 3              | 0.228          | 0.492          | 0.211           | 0.328            |
| XF13         | 2               | 217-264    | 16             | 0.715          | 0.773          | 0.012           | 0.060            |
| XG75         | 2               | 148-166    | 10             | 0.579          | 0.648          | -0.018          | -0.057           |
| XV01         | 2               | 211-404    | 38             | 0.795          | 0.923          | 0.023           | 0.239            |
| Global value |                 |            | 14.8           | 0.596          | 0.729          | 0.042           | 0.146            |

N<sub>A</sub>, number of alleles; H<sub>o</sub>, observed heterozygosity; H<sub>e</sub>, expected heterozygosity; F<sub>ST</sub>, fixation index (Weir & Cockerham 1984); G'<sub>ST</sub>, genetic differentiation measure (Hedrick 2005). All F<sub>ST</sub> and G'<sub>ST</sub> values are significantly different from zero (p<0.001) aside from XG75 where negative values indicate no differentiation from zero.

**Table S3.** Datasets used for different analysis showing N genotypes included from each site. Analyses conducted on each dataset indicated by annotation (\*, †, ‡, §)

| Site Name                      | City   |           | Dataset             |                                   |                           |     | Random individuals removed from transect sites§ |
|--------------------------------|--------|-----------|---------------------|-----------------------------------|---------------------------|-----|-------------------------------------------------|
|                                | Region | Site Code | Original genotypes* | Full sibs removed (main dataset)† | 20% missing data removed‡ |     |                                                 |
| Barton Creek Habitat Preserve  | Austin | BC        | 55                  | 52                                | 34                        | 29  |                                                 |
| Clymer Meadow Preserve         | Dallas | CL        | 41                  | 37                                | 17                        | 27  |                                                 |
| Clear Creek Natural Heritage   | Dallas | CNH       | 7                   | 7                                 | 7                         | 7   |                                                 |
| Connemara Prairie              | Dallas | CON       | 5                   | 5                                 | 0                         | 5   |                                                 |
| Harry S Moss Park              | Dallas | HRM       | 9                   | 9                                 | 8                         | 9   |                                                 |
| Lake Whitney State Park        | Waco   | LKW       | 30                  | 26                                | 20                        | 26  |                                                 |
| Mathew's Prairie               | Dallas | MA        | 103                 | 100                               | 96                        | 29  |                                                 |
| M & J Farms                    | Austin | MJF       | 10                  | 9                                 | 8                         | 9   |                                                 |
| Onion Creek Wildlife Sanctuary | Austin | ONC       | 5                   | 5                                 | 5                         | 5   |                                                 |
| Pedernales Falls State Park    | Austin | PED       | 17                  | 17                                | 11                        | 17  |                                                 |
| R & C Dairy                    | Dallas | RCR       | 9                   | 9                                 | 7                         | 9   |                                                 |
| Ray Roberts Lake State Park    | Dallas | RRL       | 26                  | 26                                | 20                        | 26  |                                                 |
| Smiley Woodfen Prairie         | Dallas | SM        | 130                 | 127                               | 115                       | 30  |                                                 |
| Water Quality Protection Lands | Austin | WQ        | 151                 | 150                               | 119                       | 30  |                                                 |
| Total                          |        |           | 598                 | 579                               | 467                       | 258 |                                                 |

\* Sibship

† Global F<sub>ST</sub>, Global G'<sub>ST</sub>, H<sub>o</sub>, H<sub>e</sub>, N<sub>e</sub>, F<sub>IS</sub>, IBD, IBR, Fine-Scale Spatial Auto-correlation

‡ Pairwise F<sub>ST</sub> and G'<sub>ST</sub>

§ Bayesian Genetic Clustering, Principal Components Analysis, Phylogenetic Tree

**Table S4.** Pairwise measures of genetic differentiation among the sampled sites. Pairwise  $G'_{ST}$  values are below diagonal,  $F_{ST}$  values are above diagonal. Significant pairwise differences are indicated in bold text ( $\alpha < 0.05$ ). Significance is based on 9999 permutations in GenALEx.

| Population Code | BC            | CL            | CNH          | HRM           | LKW          | MA           | MJF           | ONC          | PED          | RCR          | RRL          | SM           | WQ           |
|-----------------|---------------|---------------|--------------|---------------|--------------|--------------|---------------|--------------|--------------|--------------|--------------|--------------|--------------|
| BC              |               | <b>0.026</b>  | <b>0.047</b> | <b>0.044</b>  | <b>0.039</b> | <b>0.057</b> | 0.025         | 0.039        | 0.014        | <b>0.049</b> | <b>0.021</b> | <b>0.038</b> | <b>0.023</b> |
| CL              | <b>0.070</b>  |               | 0.039        | <b>0.039</b>  | <b>0.036</b> | <b>0.040</b> | 0.030         | 0.040        | <b>0.032</b> | 0.026        | <b>0.026</b> | <b>0.018</b> | <b>0.024</b> |
| CNH             | <b>0.113</b>  | <b>0.057</b>  |              | <b>0.061</b>  | <b>0.060</b> | <b>0.051</b> | 0.048         | 0.060        | <b>0.057</b> | 0.057        | 0.035        | <b>0.038</b> | <b>0.033</b> |
| HRM             | <b>0.102</b>  | <b>0.065</b>  | <b>0.115</b> |               | 0.036        | <b>0.081</b> | 0.042         | 0.061        | <b>0.050</b> | 0.033        | <b>0.045</b> | <b>0.061</b> | <b>0.052</b> |
| LKW             | <b>0.136</b>  | <b>0.114</b>  | <b>0.179</b> | <b>0.050</b>  |              | <b>0.086</b> | <b>0.037</b>  | 0.050        | <b>0.050</b> | <b>0.042</b> | <b>0.050</b> | <b>0.061</b> | <b>0.049</b> |
| MA              | <b>0.258</b>  | <b>0.170</b>  | <b>0.162</b> | <b>0.325</b>  | <b>0.420</b> |              | <b>0.053</b>  | <b>0.061</b> | <b>0.064</b> | 0.058        | <b>0.043</b> | <b>0.020</b> | <b>0.018</b> |
| MJF             | <b>0.011</b>  | <b>0.017</b>  | <b>0.054</b> | <b>0.026</b>  | <b>0.066</b> | <b>0.196</b> |               | 0.043        | 0.028        | 0.044        | 0.032        | <b>0.039</b> | 0.021        |
| ONC             | <b>0.025</b>  | <b>0.009</b>  | <b>0.055</b> | <b>0.073</b>  | <b>0.075</b> | <b>0.185</b> | <b>-0.037</b> |              | 0.050        | 0.054        | 0.048        | 0.041        | 0.035        |
| PED             | <b>-0.018</b> | <b>0.055</b>  | <b>0.122</b> | <b>0.086</b>  | <b>0.152</b> | <b>0.259</b> | <b>-0.026</b> | <b>0.034</b> |              | <b>0.048</b> | 0.027        | <b>0.045</b> | <b>0.027</b> |
| RCR             | <b>0.127</b>  | <b>-0.027</b> | <b>0.089</b> | <b>-0.051</b> | <b>0.080</b> | <b>0.214</b> | <b>0.025</b>  | <b>0.009</b> | <b>0.071</b> |              | <b>0.040</b> | <b>0.043</b> | <b>0.041</b> |
| RRL             | <b>0.045</b>  | <b>0.056</b>  | <b>0.038</b> | <b>0.094</b>  | <b>0.183</b> | <b>0.178</b> | <b>0.037</b>  | <b>0.063</b> | <b>0.031</b> | <b>0.064</b> |              | <b>0.027</b> | <b>0.022</b> |
| SM              | <b>0.171</b>  | <b>0.047</b>  | <b>0.096</b> | <b>0.232</b>  | <b>0.305</b> | <b>0.099</b> | <b>0.122</b>  | <b>0.066</b> | <b>0.170</b> | <b>0.132</b> | <b>0.104</b> |              | <b>0.018</b> |
| WQ              | <b>0.092</b>  | <b>0.090</b>  | <b>0.066</b> | <b>0.181</b>  | <b>0.229</b> | <b>0.090</b> | <b>0.010</b>  | <b>0.034</b> | <b>0.069</b> | <b>0.124</b> | <b>0.072</b> | <b>0.097</b> |              |

**Table S5.** MRDM results investigating geographic distance, and resistance distances for all land-use resistance surfaces (Hypotheses A, B, and Set C, 20 total resistance models) and their relationship to average Bruvo's genetic distance per site (N=528 pairs). Significant models are highlighted in bold.

| Hypothesis and Model Number                      | Landcover classes set to Lower Resistance (0.1-0.3) | Resistance Value per Land Cover Type |            |                |           |                | MRDM Results  |                |                  |
|--------------------------------------------------|-----------------------------------------------------|--------------------------------------|------------|----------------|-----------|----------------|---------------|----------------|------------------|
|                                                  |                                                     | Developed                            | Cultivated | Forest & Shrub | Grassland | Other Classes* | F             | R <sup>2</sup> | p-val            |
| Geographic Distance Model 1 (all sites included) | NA                                                  | NA                                   | NA         | NA             | NA        | NA             | <b>15.561</b> | <b>0.028</b>   | <b>0.009</b>     |
| Geographic Distance Model 2 (sites >1 km apart)  | NA                                                  | NA                                   | NA         | NA             | NA        | NA             | <b>4.011</b>  | <b>0.023</b>   | <b>0.042</b>     |
| A Model 1                                        | Grassland & Forest                                  | 0.9                                  | 0.9        | 0.1            | 0.1       | 0.9            | 4.265         | 0.008          | 0.256            |
| A Model 2                                        |                                                     | 0.5                                  | 0.5        | 0.3            | 0.3       | 0.5            | <b>24.517</b> | <b>0.045</b>   | <b>0.003</b>     |
| A Model 3                                        |                                                     | 0.7                                  | 0.7        | 0.1            | 0.1       | 0.7            | 5.923         | 0.011          | 0.163            |
| A Model 4                                        |                                                     | 0.9                                  | 0.9        | 0.3            | 0.3       | 0.9            | <b>15.116</b> | <b>0.028</b>   | <b>0.015</b>     |
| B Model 1                                        | Developed, Cultivated & Forest                      | 0.1                                  | 0.1        | 0.1            | 0.9       | 0.9            | <b>19.452</b> | <b>0.035</b>   | <b>0.008</b>     |
| B Model 2                                        |                                                     | 0.3                                  | 0.3        | 0.3            | 0.5       | 0.5            | <b>31.569</b> | <b>0.057</b>   | <b>&lt;0.001</b> |
| B Model 3                                        |                                                     | 0.1                                  | 0.1        | 0.1            | 0.7       | 0.7            | <b>21.789</b> | <b>0.040</b>   | <b>0.005</b>     |
| B Model 4                                        |                                                     | 0.3                                  | 0.3        | 0.3            | 0.9       | 0.9            | <b>28.555</b> | <b>0.051</b>   | <b>0.002</b>     |
| Set C Model 1                                    | Developed only                                      | 0.1                                  | 0.9        | 0.9            | 0.9       | 0.9            | <b>18.114</b> | <b>0.033</b>   | <b>0.017</b>     |
| Set C Model 2                                    |                                                     | 0.3                                  | 0.5        | 0.5            | 0.5       | 0.5            | <b>31.737</b> | <b>0.057</b>   | <b>0.001</b>     |
| Set C Model 3                                    |                                                     | 0.1                                  | 0.7        | 0.7            | 0.7       | 0.7            | <b>20.852</b> | <b>0.038</b>   | <b>0.006</b>     |
| Set C Model 4                                    | Cultivated only                                     | 0.3                                  | 0.9        | 0.9            | 0.9       | 0.9            | <b>28.772</b> | <b>0.052</b>   | <b>0.001</b>     |
| Set C Model 5                                    |                                                     | 0.9                                  | 0.1        | 0.9            | 0.9       | 0.9            | <b>38.810</b> | <b>0.068</b>   | <b>0.001</b>     |
| Set C Model 6                                    |                                                     | 0.5                                  | 0.3        | 0.5            | 0.5       | 0.5            | <b>39.617</b> | <b>0.070</b>   | <b>&lt;0.001</b> |
| Set C Model 7                                    |                                                     | 0.7                                  | 0.1        | 0.7            | 0.7       | 0.7            | <b>40.303</b> | <b>0.071</b>   | <b>0.001</b>     |
| Set C Model 8                                    |                                                     | 0.9                                  | 0.3        | 0.9            | 0.9       | 0.9            | <b>43.006</b> | <b>0.076</b>   | <b>&lt;0.001</b> |
| Set C Model 9                                    | Forest only                                         | 0.9                                  | 0.9        | 0.1            | 0.9       | 0.9            | 8.111         | 0.015          | 0.109            |
| Set C Model 10                                   |                                                     | 0.5                                  | 0.5        | 0.3            | 0.5       | 0.5            | <b>25.460</b> | <b>0.046</b>   | <b>0.003</b>     |
| Set C Model 11                                   |                                                     | 0.7                                  | 0.7        | 0.1            | 0.7       | 0.7            | 9.859         | 0.018          | 0.070            |
| Set C Model 12                                   |                                                     | 0.9                                  | 0.9        | 0.3            | 0.9       | 0.9            | <b>17.891</b> | <b>0.033</b>   | <b>0.008</b>     |

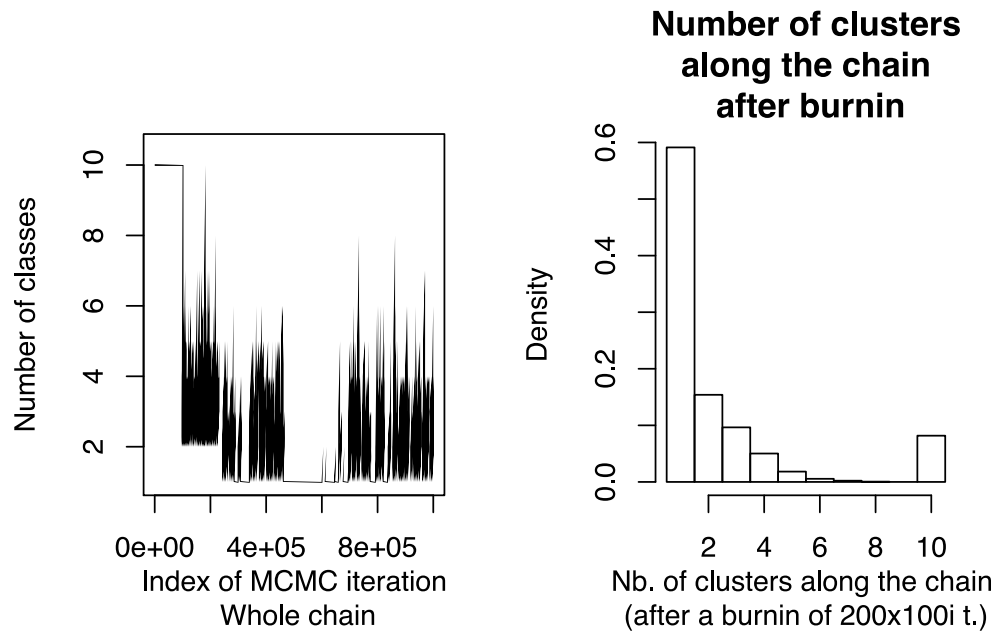

**Figure S1.** Plots showing the likely number of genetic clusters inferred by the Bayesian clustering program GENELAND (Guillot *et al.* 2005). Both plots show a clear mode at  $K=1$  across 1,000,000 Markov Chain Monte Carlo runs.

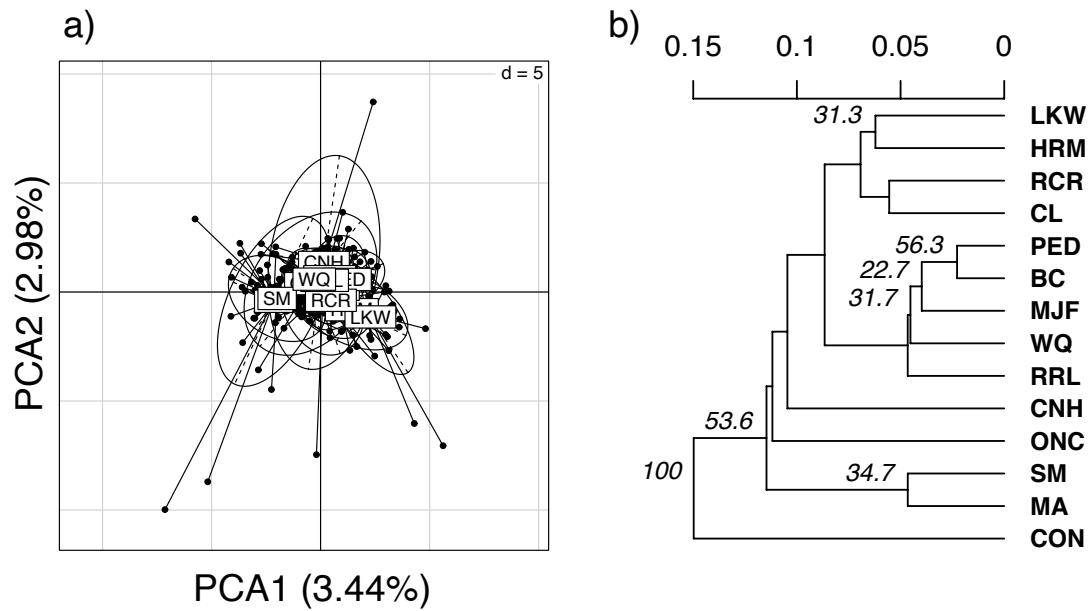

**Figure S2.** Additional genetic clustering analyses using a maximum of 30 individuals per site (Site codes defined in Tables S1 and S3). a) Principal components analysis of individual genetic differentiation between sites showing the first two PC axes. b) Rooted dendrogram with 1000 bootstraps using Nei's genetic distance between sites. Node labels indicate percentage of trees supporting node differentiation, nodes with less than 20% support are not labelled. Branch lengths (top scale) estimated with Nei's distance.
